# Supplementary material for: Tumor-Specific T Cell Activation in Malignant Brain Tumors
Source: Front Immunol. 2020 Feb 13;11:205. doi: 10.3389/fimmu.2020.00205 (PMC7031483; doi:10.3389/fimmu.2020.00205)
Supplement: Supplementary Table 1 — The table summarizes the search results of “(glioblastoma) and (vaccine)” on clinicaltrials.gov, last updated 11/2018. We excluded terminated trials, trials with unknown status, withdrawn studies and non-vaccine or immunostimulatory trials. We do not claim that this table displays a complete overview of all clinical trials for this topic and therefore sincerely apologize if additional trials were missed. [file Table_1.XLSX]

## Sheet: Suppl Table
NCT Trial Number	Short Name	Tumor Type	Primary / Recurrence	Patient number (aim)	Status	Country	Estimated date of completion	Phase	HLA stratification	Type of vaccine	Adjuvant	addition of Checkpoint inhibitor	Route of vaccine adminatration	Sponsor / Collaborator	Last study update
NCT02709616	PERCELLVAC	GBM	newly diagnosed	20	Recruiting	China	June 2019	I/II	no	Tumor antigen mRNA-pulsed DCs and PBMCs	no	no	n.a.	Beijing Tricision Biotherapeutics Inc.	2016-06-20
NCT02808364	PERCELLVAC2	GBM	recurrence	30	Recruiting	China	2019-09-01	I/II	no	Tumor antigen mRNA-pulsed DCs and PBMCs	no	no	n.a.	Beijing Tricision Biotherapeutics Inc.	2016-06-21
NCT02049489	ICT-121	GBM	recurrence	20	Completed	USA	March 2017	I	HLA-A2+	Autologous CD133 DC vaccine	no	no	intradermally	ImmunoCellular Therapeutics, Ltd.	2018-08-13
NCT02149225	GAPVAC	GBM	newly diagnosed	16	Completed	Europe	June 2018	I	HLA-A2+ or HLA-A24+	Tailored peptide vaccine	Poly-IC:LC, GM-CSF	no	intradermally	Immatics Biotechnologies GmbH	2018-08-07
NCT00323115	-	GBM	newly diagnosed	11	Completed	USA	July 2013	II	no	Autologous DC vaccine	no	no	cervical LN injection	Darthmouth-Hitchcock Medical Center	2015-11-02
NCT03223103	-	GBM	newly diagnosed	2	Active, not recruiting	USA	May 2020	Ia/b	no	Synthetic long peptides (SLP)	Poly-IC:LC	no	n.a.	Adilia Hormigo and NovoCure Ltd.	2018-06-01
NCT03422094	NeoVax	GBM	newly diagnosed	30	Not yet recruiting	USA	October 2023	I	no	20 synthetic long peptides	Poly-IC:LC	Nivolumab +/- Ipilimumab	subcutaneous	Washington University	2018-08-01
NCT03395587	GlioVax	GBM	newly diagnosed	136	Recruiting	Germany	June 2023	II	no	Autologous tumor lysate pulsed on DCs	no	no	intradermally	German Federal Ministry of Education and Research, Heinrich-Heine University Düsseldorf	2018-05-09
NCT01006044	-	GBM	newly diagnosed	26	Completed	Spain	2014-08-01	II	no	Autologous tumor lysate pulsed on DCs	no	no	subcutaneous	Universidad de Navarra	2014-09-03
NCT03360708	-	GBM	recurrent	20	Not yet recruiting	USA	December 2022	I	no	Autologous DC vaccine + autol. Cytokine-induced Kill cell transfer	no	no	intradermally + i.v.	Mayo Clinic + NCI	2018-04-18
NCT01957956	-	GBM	newly diagnosed	21	Active, not recruiting	USA	2018-11-01	I	no	Autologous tumor lysate pulsed on DCs	no	no	intradermally	Mayo Clinic + NCI	2018-08-15
NCT01808820	-	AA+GBM	recurrence	20	Active, not recruiting	USA	February 2024	I	no	Autologous tumor lysate pulsed on DCs	imiquimod	no	intradermally	Macarena de la Fuente, Miami University	2018-08-08
NCT02010606	-	GBM	newly diagnosed + recurrent	40	Active, not recruiting	USA	January 2021	I	no	Allogeneic tumor stem-like cell pulsed DCs	no	no	n.a.	Cedars-Sinai Medical Center, LA	2018-02-08
NCT02649582	ADDIT-GLIO	GBM	newly diagnosed	20	Recruiting	Belgium	December 2022	I/II	no	Autologous WT1 mRNA pulsed DCs	no	no	intradermally	University Hospital Antwerpen	2018-05-24
NCT03382977	VBI-1901	GBM	recurrence	18	Recruiting	USA	December 2019	I/IIa	no	Virus-like Particle GBM Vaccine	GM-CSF	no	intradermally	VBI Vaccines Inc.	2018-08-27
NCT01814813	HSPPC-96	GBM	recurrence	90	Active, not recruiting	USA	February 2019	II	no	Autologous tumor heat shock protein-complexes	no	no	intradermally	Agenus Inc., NCI, Alliance for Clinical Trials in Oncology	2018-05-02
NCT00576537	-	Atypical malignant brain tumor	n.a.	50	Completed	USA	October 2011	II	no	Autologous tumor lysate pulsed on DCs	no	no	subcutaneous	Cedars-Sinai Medical Center, LA	2013-02-20
NCT02455557	SurVaxM	GBM	newly diagnosed	64	Active, not recruiting	USA	May 2019	II	HLA-A02, -A03, -A11, -A24	Survivin peptide vaccine	KLH, Montanide, GM-CSF	no	subcutaneous	Roswell Park Cancer Institute, NCI	2018-06-19
NCT01222221	IMA950	GBM	newly diagnosed	45	Completed	UK	February 2015	I	HLA-A02+	multi-peptide vaccine	GM-CSF	no	intradermally	Cancer Research UK, immatics Biotechnology GmbH	2015-10-14
NCT02078648	SL-701	GBM	recurrence	74	Completed	USA	January 2018	I/II	HLA-A02+	Glioma-associated antigen multivalent vaccine	Poly-IC:LC	no	subcutaneous	Stemline Therapeutics Inc.	2008-01-26
NCT01759810	-	GBM	newly diagnosed + recurrent	60	Enrolling by invitation	Russia	December 2020	II/III	yes	Proteom-based DC vaccine, CTL and HSC transfer	no	no	intrathecal, subcutaneous	NeuroVita Clinic	2017-10-12
NCT00846456	-	GBM	newly diagnosed	20	Completed	Norway	February 2013	I/II	no	Stem-like cell mRNA pulsed onto DCs	no	no	intradermally	Oslo University Hospital	2015-10-20
NCT01920191	IMA950	GBM	newly diagnosed	19	Completed	Switzerland	March 2016	I/II	HLA-A02+	multi-peptide vaccine	Poly-IC:LC	no	intradermally	Immatics Biotechnologies GmbH	2016-04-10
NCT03615404	ATTAC-P	GBM + Medulloblastoma	newly diagnosed + recurrent, pediatric	10	Not yet recruiting	USA	October 2022	I	no	CMV mRNA pulsed DCs	GM-CSF, Tet toxoid	no	intradermally	G. Archer and NIH	2018-08-03
NCT03014804	DCVax-L + Nivo	GBM	recurrence	30	Not yet recruiting	USA	October 2020	II	no	Autologous tumor lysate pulsed on DCs (DCVax-L)	no	Nivolumab	intradermally	Jonsson Comprehensiv Cancer Center; Northwest Biotherapeutics; NCI, BMS	2018-07-13
NCT02465268	ATTAC-II	GBM	newly diagnosed	150	Recruiting	USA	June 2024	II	no	autologous CMV pp65-shLAMP RNA DC vaccine	GM-CSF, Tet-Diph Toxoid	no	subcutaneous	University of Florida; NCI	2018-07-26
NCT00643097	ACTIVATe	GBM	newly diagnosed	40	Completed	USA	2016-11-01	II	no	PEP-3-KLH vaccine (EGFRvIII)	GM-CSF	no	intradermally	John Sampson, Duke	2017-02-01
NCT00639639	ATTAC	GBM	newly diagnosed	16	Active, not recruiting	USA	December 2019	I/II	no	CMV pp65-LAMP mRNA-loaded DC +/- autol. Lymphocyte transfer	Tet toxoid	no	intradermally	G. Archer and NIH	2018-05-17
NCT02287428	NeoVax	GBM	newly diagnosed	46	Active, not recruiting	USA	2020-08-01	I	no	Personalized NeoAntigen Vaccine	no	Pembrolizumab	n.a.	Dana Farber Cancer Institute; Merck; The Ben & Catherine Ivy Foundation; Accelerate Brain Cancer Cure	2018-06-01
NCT02366728	ELEVATE	GBM	newly diagnosed	100	Active, not recruiting	USA	June 2020	II	no	CMV-specific DC vaccine	Tet toxoid; Basiliximab	no	intradermally	G. Archer	2018-04-05
NCT02864368	PERFORMANCE	GBM	newly diagnosed	45	Recruiting	USA	October 2020	I	no	CMV peptide vaccine mixture	Tet-diph Toxoid; GM-CSF	no	intradermally	G. Archer; NIH; NCI; Annias Immunotherapeutics Inc.	2018-03-22
NCT00626483	REGULATe	GBM	newly diagnosed	18	Active, not recruiting	USA	June 2019	I	no	CMV pp65-LAMP mRNA-loaded DC	basiliximab; GM-CSF	no	intradermally	G. Archer	2018-05-17
NCT03392545	InSituVac1	GBM	recurrence	30	Not yet recruiting	China	December 2019	I	no	Immune adjuvants and radiation	GM-CSF; poly-IC:LC	no	intratumorally	Beijing Tiantan Hospital; Duke University	2018-02-16
NCT00905060	HeatShock	GBM	newly diagnosed	70	Completed	USA	2014-04-01	II	no	Autologous tumor derived HSPPC-96 vaccine	no	no	intradermally	University of California, SF; Agenus Inc.	2018-05-03
NCT02754362	-	GBM	recurrence	30	Active, not recruiting	USA	December 018	II	no	Tumor-associated long synthetic peptides mixed with Montanide	Poly-IC:LC	no	n.a.	New York University; Mount Sinai Hospital	2018-01-23
NCT02718443	VXM01	GBM + AA °III	recurrence	14	Completed	Germany	July 2018	I	no	VEGFR2-specific oral T-cell activator	no	no	per os	Vaximm GmbH	2018-10-19
NCT03548571	DEN-STEM	GBM	newly diagnosed	60	Recruiting	Norway	May 2023	II/III	no	DC-transfected with mRNA of survivin, hTERT or autol. Tumor stem cell derived tumorspheres	no	no	intradermally	Oslo University Hospital	2018-07-07
NCT02529072	AVERT	GBM + AA °III	newly diagnosed	7	Active, not recruiting	USA	December 2019	I	no	autologous CMV pp65-shLAMP RNA DC vaccine	no	Nivolumab	intradermally	G. Archer, BMS, Duke Cancer Institute	2018-11-08
NCT01213407	GBM-Vax-TRX2	GBM	newly diagnosed	87	Completed	Austria	2015-11-01	II	no	Autologous IL-12 secreting DCs loaded with autologous tumor lysate	no	no	intranodally	Activartis Biotech	2016-05-19
NCT01491893	PVSRIPO	GBM	recurrence	61	Active, not recruiting	USA	June 2021	I	no	recombinant Polio-Virus (PVSRIPO)	Polio-Boost	no	intratumorally	Istari Oncology, NCI, Brain Tumor Research Charity, Duke	2018-09-28
NCT00576641	-	GBM + Brainstem Glioma	newly diagnosed	22	Completed	USA	2012-04-01	I	HLA-A1 or -A2	Autologous DC vaccine	no	no	n.a.	Cedars-Sinai Medical Center, LA	2014-10-30
NCT03018288	-	GBM	newly diagnosed	108	Recruiting	USA	January 2024	II	no	HSPCC-96 vaccine	no	Pembrolizumab	intradermally	NCI	2018-08-17
NCT03665545	IMA950-106	GBM	newly diagnosed	24	Not yet recruiting	Switzerland	2023-11-01	I/II	HLA-A02+	IMA950 poly-peptide vaccine	Poly-IC:LC	Pembrolizumab	subcutaneous	University Hospital Geneva	2018-09-11
NCT00626015	ZAP IT	GBM	newly diagnosed	16	Completed	USA	2013-02-01	I	no	PEP-3-KLH vaccine (EGFRvIII)	Basiliximab	no	intradermally	John Sampson, Duke	2016-01-21
NCT01290692	-	GBM	newly diagnosed	86	Completed	USA	2014-02-01	II	no	Autologous ex vivo stimulated PBMCs	no	no	intravenously	TVAX Biomedical	2016-10-24
NCT01081223	-	GBM	recurrence	14	Completed	USA	March 2011	I/II	no	Autologous ex vivo stimulated PBMCs	IL-2, GM-CSF	no	intravenously	TVAX Biomedical	2013-06-06
NCT00890032	-	GBM	recurrence	50	Completed	USA	February 2016	I	no	isolated brain tumor stem cells (BTSC) mRNA-loaded DCs	no	no	intradermally	John Sampson, Duke, NCI	2016-10-17
NCT01204684	-	GBM + AA °III + AO °III	newly diagnosed	60	Active, not recruiting	USA	October 2019	II	no	Autologous tumor lysate pulsed on DCs	Poly-IC:LC, resiquimod	no	intradermally	Jonsson Comprehensiv Cancer Center	2017-10-13
NCT02722512	-	GBM + Ependymoma	newly diagnosed + recurrent	20	Recruiting	USA	May 2019	I	no	Heat Shock Protein Peptide Complex-96 (HSPCC-96) vaccine	no	no	intradermally	Ann & Robert H Lurie Children`s Hospital of Chicago	2017-07-21
NCT01967758	-	GBM + AA °III	newly diagnosed	11	Completed	USA	2018-08-01	I	no	live-attenuated strain of Listeria monocytogenes expressing EGFRvIII and NY-ESO-1 antigens (ADU-623)	antibiotics	no	intravenously	Providence Health & Services / Aduor Biotec, Inc.	2018-10-23
NCT01280552	ICT-107	GBM	newly diagnosed	124	Completed	n.a.	December 2015	II	HLA-A1 or -A2	Autologous multi-peptide-pulsed DCs	no	no	intradermally	ImmunoCellular Therapeutics, Ltd.	2017-03-20
NCT03400917	AV-GBM-1	GBM	newly diagnosed	55	Recruiting	USA	June 2023	II	no	Autologous tumor-associated antigens (AV-GBM-1)-pulsed DCs	GM-CSF	no	n.a.	Aivita Biomedical, Inc.	2018-10-30
NCT02122822	-	Glioma	newly diagnosed	20	Completed	China	May 2017	I	no	HSPCC-96 vaccine	no	no	subcutaneous	Cure&Sure Biotech Co., LTD, Beijing Tiantan Hospital	2017-11-17
NCT02146066	DCVax-L EAP	GBM	newly diagnosed + recurrent	n.a.	Available	USA	n.a.	n.a.	no	Autologous tumor lysate pulsed on DCs (DCVax-L)	no	no	intradermally	Northwest Biotherapeutics	2016-02-26
NCT01250470	-	All malignant Glioma	n.a.	9	Completed	USA	May 2014	I	HLA-A2 or -A3	ISA-51/survivin peptide vaccine	Montanide, Sagramostim	no	subcutaneous	Roswell Park Cancer Institute, NCI	2017-02-27
NCT01171469	-	GBM + AA °III + Medulloblastoma	recurrence	8	Completed	USA	June 2012	I	no	Autologous DC pulsed with allogeneic BTSC	Imiquimod	no	intradermally	Masonic Cancer Center, University of Minnesota	2017-12-02
NCT01498328	ReACT	GBM	newly diagnosed + recurrent	127	Completed	USA	May 2016	II	no	EGFRvIII-peptide vaccine (CDX-110)	KLH, GM-CSF	no	intradermally	Celldex Therapeutics	2017-04-07
NCT01480479	ACT IV	GBM	newly diagnosed	745	Completed	International	2016-11-01	III	no	EGFRvIII-peptide vaccine (CDX-110)	KLH, GM-CSF	no	intradermally	Celldex Therapeutics	2018-01-16
NCT01522820	-	Pan Cancer (incl. Glioma)	n.a.	18	Completed	USA	July 2016	I	no	DC vaccine with DEC205-NY-ESO-1 vaccine (fusion protein CDX-1401)	no	no	intranodally	Roswell Park Cancer Institute, NCI	2016-10-04
NCT00458601	ACT III	GBM	newly diagnosed	82	Completed	USA	May 2016	II	no	EGFRvIII-peptide vaccine (CDX-110)	KLH, GM-CSF	no	intradermally	Celldex Therapeutics	2018-01-16
NCT03650257	-	GBM	newly diagnosed	150	Not yet recruiting	China	2023-08-01	II	no	Heat Shock Protein Peptide Complex-96 (HSPCC-96) vaccine	no	no	n.a.	Cure&Sure Biotech Co., LTD, Beijing Tiantan Hospital	2018-08-28
NCT03149003	WIZARD 201G	GBM	recurrence	200	Recruiting	International	June 2020	II	HLA-A02:01, -A02:06, -A24:02	Synthetic cancer peptide vaccine against WT-1 expressing cells (DSP-7888)	no	no	intradermally or s.c.	Boston Biomedical, Inc	2018-09-11
NCT03657576	C134-HSV-1	GBM + AA °III	recurrence	24	Not yet recruiting	USA	2023-09-01	I	no	Cancer killing IRS HSV-1 (C134)	no	no	intratumorally	University of Alabama at Birmingham	2018-09-05
NCT00293423	-	HGG	recurrence	41	Completed	USA	2013-08-01	I/II	no	Heat Shock Protein Peptide Complex-96 (HSPCC-96) vaccine	no	no	intradermally	University of California, SF; Agenus Inc., NCI	2017-08-21
NCT00589875	BrTK02	GBM + AA °III	newly diagnosed	52	Completed	USA	2016-08-01	II	no	Genetically modified Herpes thymidine kinase gene adenoviral vector	no	no	intratumorally	Advantagene, Inc.	2017-04-11
NCT02800486	-	GBM + AA °III + AO °III	recurrence	37	Recruiting	USA	May 2021	II	no	Super selective intra-arterial injection of anti-EGFR-antibody (Cetuximab)	no	no	intraarterially	Northwell Health	2018-03-01
NCT00003185	-	GBM + AA °III	newly diagnosed	40	Completed	USA	July 1998	II	no	Autologous tumor cell vaccine, consecutive LN removal and T cell expansion (+SEA + IL-2) and re-infusion	GM-CSF, SEA, IL-2	no	intradermally / i.v.	The Cleveland Clinic, NCI	2013-12-04
NCT00751270	BrTK01	GBM + AA °III	newly diagnosed	15	Completed	USA	2011-01-01	I	no	Genetically modified Herpes thymidine kinase gene adenoviral vector	no	no	intratumorally	Advantagene, Inc.	2016-03-04
NCT00612001	-	HGG	newly diagnosed + recurrent	8	Completed	USA	October 2012	I	HLA-A02+	Glioma-associated antigen peptide-pulsed autologous DCs	GM-CSF	no	intradermally	Jonsson Comprehensiv Cancer Center, NCI	2015-10-05
NCT00069940	-	Brain tumor + GI-Tumor + Sarcoma	newly diagnosed + recurrent	n.a.	Completed	USA	2008-08-01	I	HLA-A02+	Telomerase 540-548 peptide vaccine	GM-CSF	no	n.a.	Dana Farber Cancer Institute, NCI	2010-12-28
NCT02208362	-	HGG	recurrence	92	Recruiting	USA	May 2020	I	no	IL13Rα2-specific, 41BB-costimulatory CAR/truncated CD19-expressing Autologous T lymphocytes	no	no	intratumorally / -cavitary / -ventricular	Citiy of Hope Medical Center, NCI, Gateway for Cancer Research, Mustang Bio, Inc.	2018-10-30
NCT02498665	-	Multiple Cancers (incl. GBM)	n.a.	24	Active, not recruiting	USA	October 2018	I	HLA-A02:01, -A02:06, -A24:02	Synthetic cancer peptide vaccine against WT-1 expressing cells (DSP-7888)	no	no	intradermally	Boston Biomedical, Inc	2018-09-19
NCT00068510	-	HGG	newly diagnosed	28	Completed	USA	2012-09-01	I	no	Autologous tumor lysate pulsed on DCs	GM-CSF	no	intradermally	Jonsson Comprehensiv Cancer Center, NCI	2015-10-02
NCT03043391	PVSRIPO	Malignant Glioma	recurrence	12	Recruiting	USA	July 2021	I	no	recombinant Polio-Virus (PVSRIPO)	Polio-Boost	no	intratumorally	Istari Oncology, Solving Kids Cancer, Musella Foundation Inc., The Andrew McDonough B+ Foundation, Duke University	2018-10-30
NCT00014573	-	Malignant Brain Tumors	newly diagnosed	n.a.	Completed	USA	October 2004	II	no	Autologous tumor cell vaccine, consecutive apheresis, CT, and re-infusion	G-CSF, GM-CSF, IL-2	no	subcutaneous, i.v.	Barbara Ann Karmanos Cancer Institute, NCI	2013-04-08
NCT02457845	-	Malignant Brain Tumors	newly diagnosed + recurrent	18	Recruiting	USA	May 2019	I	no	Oncolytic Herpes simplex virus-1 (HSV-1)(G207)	no	no	intratumorally	University of Alabama at Birmingham	2018-07-06
NCT00004024	-	Astrocytoma/Oligodendroglioma °II-IV	newly diagnosed + recurrent	60	Completed	USA	2004-01-01	II	no	Autologous irradiated tumor cell vaccine, consecutive cell collection and activation (OKT3), re-infusion	GM-CSF, IL-2	no	intradermally + i.v.	Barbara Ann Karmanos Cancer Institute, NCI	2013-04-05
NCT01621542	-	Pan Cancer (incl. Glioma)	n.a.	64	Completed	USA	May 2017	I	HLA-A02:01, -A02:06	WT1-specific vaccine (WT2725)	no	no	n.a.	Sunovion Dainippon Pharma Co., Ltd.	2017-06-05
excluding terminated, unknown status or withdrawn studies, non vaccine or immunostimulatory trials
search query: glioblastoma, vaccine
Table last updated: 11.11.2018

## Sheet: Trials
NCT Trial Number	Name	Tumor Type	Primary / Recurrence	Patient number (aim)	Country	Initial Aim of Estimated completion	Phase	I	I/II	II	III	n in I	n in I/II	n in II	n in III	Publication	HLA stratified	Type of vaccine	DC	Cell transfer	pure peptide	virus	others	peptide/protein	mRNA	tumor lysate	virus	others	Checkpoint	Route of vaccine adminatration	Adjuvant	Sponsor / Collaborator	Status	Last Update
NCT02709616	PERCELLVAC	GBM	newly diagnosed	20	China	June 2019	I/II		1			0	20	0	0	n.a.	no	Tumor antigen mRNA-pulsed DCs and PBMCs	1						1				no	n.a.	no	Beijing Tricision Biotherapeutics Inc.	Recruiting	2016-06-20		excluding terminated, unknown status or withdrawn studies, non vaccine or immunostimulatory trials
NCT02808364	PERCELLVAC2	GBM	recurrence	30	China	2019-09-01	I/II		1			0	30	0	0	n.a.	no	Tumor antigen mRNA-pulsed DCs and PBMCs	1						1				no	n.a.	no	Beijing Tricision Biotherapeutics Inc.	Recruiting	2016-06-21		search query: glioblastoma, vaccine
NCT02049489	ICT-121	GBM	recurrence	20	USA	March 2017	I	1				20	0	0	0	n.a.	HLA-A2+	Autologous CD133 DC vaccine	1							1			no	intradermally	no	ImmunoCellular Therapeutics, Ltd.	Completed	2018-08-13		Stand: 11.11.2018
NCT02149225	GAPVAC	GBM	newly diagnosed	16	Europe	June 2018	I	1				16	0	0	0	n.a.	HLA-A2+ or HLA-A24+	Tailored peptide vaccine			1			1					no	intradermally	Poly-IC:LC, GM-CSF	Immatics Biotechnologies GmbH	Completed	2018-08-07
NCT00323115	-	GBM	newly diagnosed	11	USA	July 2013	II			1		0	0	11	0	yes	no	Autologous DC vaccine	1							1			no	cervical LN injection	no	Darthmouth-Hitchcock Medical Center	Completed	2015-11-02
NCT03223103	-	GBM	newly diagnosed	2	USA	May 2020	Ia/b	1				2	0	0	0	n.a.	no	Synthetic long peptides (SLP)			1			1					no	n.a.	Poly-IC:LC	Adilia Hormigo and NovoCure Ltd.	Active, not recruiting	2018-06-01
NCT03422094	NeoVax	GBM	newly diagnosed	30	USA	October 2023	I	1				30	0	0	0	n.a.	no	20 synthetic long peptides			1			1					Nivolumab +/- Ipilimumab	subcutaneous	Poly-IC:LC	Washington University	Not yet recruiting	2018-08-01
NCT03395587	GlioVax	GBM	newly diagnosed	136	Germany	June 2023	II			1		0	0	136	0	PMID 29801515	no	Autologous tumor lysate pulsed on DCs	1							1			no	intradermally	no	German Federal Ministry of Education and Research, Heinrich-Heine University Düsseldorf	Recruiting	2018-05-09
NCT01006044	-	GBM	newly diagnosed	26	Spain	2014-08-01	II			1		0	0	26	0	PMID 28499389	no	Autologous tumor lysate pulsed on DCs	1							1			no	subcutaneous	no	Universidad de Navarra	Completed	2014-09-03
NCT03360708	-	GBM	recurrent	20	USA	December 2022	I	1				20	0	0	0	n.a.	no	Autologous DC vaccine + autol. Cytokine-induced Kill cell transfer	1	1						1			no	intradermally + i.v.	no	Mayo Clinic + NCI	Not yet recruiting	2018-04-18
NCT01957956	-	GBM	newly diagnosed	21	USA	2018-11-01	I	1				21	0	0	0	n.a.	no	Autologous tumor lysate pulsed on DCs	1							1			no	intradermally	no	Mayo Clinic + NCI	Active, not recruiting	2018-08-15
NCT01808820	-	AA+GBM	recurrence	20	USA	February 2024	I	1				20	0	0	0	n.a.	no	Autologous tumor lysate pulsed on DCs	1							1			no	intradermally	imiquimod	Macarena de la Fuente, Miami University	Active, not recruiting	2018-08-08
NCT02010606	-	GBM	newly diagnosed + recurrent	40	USA	January 2021	I	1				40	0	0	0	n.a.	no	Allogeneic tumor stem-like cell pulsed DCs	1							1			no	n.a.	no	Cedars-Sinai Medical Center, LA	Active, not recruiting	2018-02-08
NCT02649582	ADDIT-GLIO	GBM	newly diagnosed	20	Belgium	December 2022	I/II		1			0	20	0	0	n.a.	no	Autologous WT1 mRNA pulsed DCs	1						1				no	intradermally	no	University Hospital Antwerpen	Recruiting	2018-05-24
NCT03382977	VBI-1901	GBM	recurrence	18	USA	December 2019	I/IIa		1			0	18	0	0	n.a.	no	Virus-like Particle GBM Vaccine				1					1		no	intradermally	GM-CSF	VBI Vaccines Inc.	Recruiting	2018-08-27
NCT01814813	HSPPC-96	GBM	recurrence	90	USA	February 2019	II			1		0	0	90	0	n.a.	no	Autologous tumor heat shock protein-complexes								1			no	intradermally	no	Agenus Inc., NCI, Alliance for Clinical Trials in Oncology	Active, not recruiting	2018-05-02
NCT00576537	-	Atypical malignan Brain Tumor	n.a.	50	USA	October 2011	II			1		0	0	50	0	n.a.	no	Autologous tumor lysate pulsed on DCs	1							1			no	subcutaneous	no	Cedars-Sinai Medical Center, LA	Completed	2013-02-20
NCT02455557	SurVaxM	GBM	newly diagnosed	64	USA	May 2019	II			1		0	0	64	0	n.a.	HLA-A02, -A03, -A11, -A24	Survivin peptide vaccine			1			1					no	subcutaneous	KLH, Montanide, GM-CSF	Roswell Park Cancer Institute, NCI	Active, not recruiting	2018-06-19
NCT01222221	IMA950	GBM	newly diagnosed	45	UK	February 2015	I	1				45	0	0	0	PMID 27225692	HLA-A02+	multi-peptide vaccine			1			1					no	intradermally	GM-CSF	Cancer Research UK, immatics Biotechnology GmbH	Completed	2015-10-14
NCT02078648	SL-701	GBM	recurrence	74	USA	January 2018	I/II		1			0	74	0	0	n.a.	HLA-A02+	Glioma-associated antigen multivalent vaccine			1			1					no	subcutaneous	Poly-IC:LC	Stemline Therapeutics Inc.	Completed	2008-01-26
NCT01759810	-	GBM	newly diagnosed + recurrent	60	Russia	December 2020	II/III				1	0	0	0	60	n.a.	yes	Proteom-based DC vaccine, CTL and HSC transfer	1					1					no	intrathecal, subcutaneous	no	NeuroVita Clinic	Enrolling by invitation	2017-10-12
NCT00846456	-	GBM	newly diagnosed	20	Norway	February 2013	I/II		1			0	20	0	0	PMID 23817721	no	Stem-like cell mRNA pulsed onto DCs	1						1				no	intradermally	no	Oslo University Hospital	Completed	2015-10-20
NCT01920191	IMA950	GBM	newly diagnosed	19	Switzerland	March 2016	I/II		1			0	19	0	0	n.a.	HLA-A02+	multi-peptide vaccine			1			1					no	intradermally	Poly-IC:LC	Immatics Biotechnologies GmbH	Completed	2016-04-10
NCT03615404	ATTAC-P	GBM + Medulloblastoma	newly diagnosed + recurrent, pediatric	10	USA	October 2022	I	1				10	0	0	0	n.a.	no	CMV mRNA pulsed DCs	1						1				no	intradermally	GM-CSF, Tet toxoid	G. Archer and NIH	Not yet recruiting	2018-08-03
NCT03014804	DCVax-L + Nivo	GBM	recurrence	30	USA	October 2020	II			1		0	0	30	0	n.a.	no	Autologous tumor lysate pulsed on DCs (DCVax-L)	1							1			Nivolumab	intradermally	no	Jonsson Comprehensiv Cancer Center; Northwest Biotherapeutics; NCI, BMS	Not yet recruiting	2018-07-13
NCT02465268	ATTAC-II	GBM	newly diagnosed	150	USA	June 2024	II			1		0	0	150	0	n.a.	no	autologous CMV pp65-shLAMP RNA DC vaccine	1						1				no	subcutaneous	GM-CSF, Tet-Diph Toxoid	University of Florida; NCI	Recruiting	2018-07-26
NCT00643097	ACTIVATe	GBM	newly diagnosed	40	USA	2016-11-01	II			1		0	0	40	0	yes	no	PEP-3-KLH vaccine (EGFRvIII)			1			1					no	intradermally	GM-CSF	John Sampson, Duke	Completed	2017-02-01
NCT00639639	ATTAC	GBM	newly diagnosed	16	USA	December 2019	I/II		1			0	16	0	0	n.a.	no	CMV pp65-LAMP mRNA-loaded DC +/- autol. Lymphocyte transfer	1	1					1				no	intradermally	Tet toxoid	G. Archer and NIH	Active, not recruiting	2018-05-17
NCT02287428	NeoVax	GBM	newly diagnosed	46	USA	2020-08-01	I	1				46	0	0	0	n.a.	no	Personalized NeoAntigen Vaccine			1			1					Pembrolizumab	n.a.	no	Dana Farber Cancer Institute; Merck; The Ben & Catherine Ivy Foundation; Accelerate Brain Cancer Cure	Active, not recruiting	2018-06-01
NCT02366728	ELEVATE	GBM	newly diagnosed	100	USA	June 2020	II			1		0	0	100	0	n.a.	no	CMV-specific DC vaccine	1					1					no	intradermally	Tet toxoid; Basiliximab	G. Archer	Active, not recruiting	2018-04-05
NCT02864368	PERFORMANCE	GBM	newly diagnosed	45	USA	October 2020	I	1				45	0	0	0	n.a.	no	CMV peptide vaccine mixture			1			1					no	intradermally	Tet-diph Toxoid; GM-CSF	G. Archer; NIH; NCI; Annias Immunotherapeutics Inc.	Recruiting	2018-03-22
NCT00626483	REGULATe	GBM	newly diagnosed	18	USA	June 2019	I	1				18	0	0	0	n.a.	no	CMV pp65-LAMP mRNA-loaded DC	1						1				no	intradermally	basiliximab; GM-CSF	G. Archer	Active, not recruiting	2018-05-17
NCT03392545	InSituVac1	GBM	recurrence	30	China	December 2019	I	1				30	0	0	0	n.a.	no	Immune adjuvants and radiation					1					1	no	intratumorally	GM-CSF; poly-IC:LC	Beijing Tiantan Hospital; Duke University	Not yet recruiting	2018-02-16
NCT00905060	HeatShock	GBM	newly diagnosed	70	USA	2014-04-01	II			1		0	0	70	0	n.a.	no	Autologous tumor derived HSPPC-96 vaccine			1			1					no	intradermally	no	University of California, SF; Agenus Inc.	Completed	2018-05-03
NCT02754362	-	GBM	recurrence	30	USA	December 018	II			1		0	0	30	0	n.a.	no	Tumor-associated long synthetic peptides mixed with Montanide			1			1					no	n.a.	Poly-IC:LC	New York University; Mount Sinai Hospital	Active, not recruiting	2018-01-23
NCT02718443	VXM01	GBM + AA °III	recurrence	14	Germany	July 2018	I	1				14	0	0	0	n.a.	no	VEGFR2-specific oral T-cell activator					1					1	no	p.o.	no	Vaximm GmbH	Completed	2018-10-19
NCT03548571	DEN-STEM	GBM	newly diagnosed	60	Norway	May 2023	II/III				1	0	0	0	60	n.a.	no	DC-transfected with mRNA of survivin, hTERT or autol. Tumor stem cell derived tumorspheres	1						1				no	intradermally	no	Oslo University Hospital	Recruiting	2018-07-07
NCT02529072	AVERT	GBM + AA °III	newly diagnosed	7	USA	December 2019	I	1				7	0	0	0	n.a.	no	autologous CMV pp65-shLAMP RNA DC vaccine	1						1				Nivolumab	intradermally	no	G. Archer, BMS, Duke Cancer Institute	Active, not recruiting	2018-11-08
NCT01213407	GBM-Vax-TRX2	GBM	newly diagnosed	87	Austria	2015-11-01	II			1		0	0	87	0	n.a.	no	Autologous IL-12 secreting DCs loaded with autologous tumor lysate	1							1			no	intranodally	no	Activartis Biotech	Completed	2016-05-19
NCT01491893	PVSRIPO	GBM	recurrence	61	USA	June 2021	I	1				61	0	0	0	PMID 29943666	no	recombinant Polio-Virus (PVSRIPO)				1					1		no	intratumorally	Polio-Boost	Istari Oncology, NCI, Brain Tumor Research Charity, Duke	Active, not recruiting	2018-09-28
NCT00576641	-	GBM + Brainstem Glioma	newly diagnosed	22	USA	2012-04-01	I	1				22	0	0	0	n.a.	HLA-A1 or -A2	Autologous DC vaccine	1							1			no	n.a.	no	Cedars-Sinai Medical Center, LA	Completed	2014-10-30
NCT03018288	-	GBM	newly diagnosed	108	USA	January 2024	II			1		0	0	108	0	n.a.	no	HSPCC-96 vaccine			1			1					Pembrolizumab	intradermally	no	NCI	Recruiting	2018-08-17
NCT03665545	IMA950-106	GBM	newly diagnosed	24	Switzerland	2023-11-01	I/II		1			0	24	0	0	n.a.	HLA-A02+	IMA950 poly-peptide vaccine			1			1					Pembrolizumab	subcutaneous	Poly-IC:LC	University Hospital Geneva	Not yet recruiting	2018-09-11
NCT00626015	ZAP IT	GBM	newly diagnosed	16	USA	2013-02-01	I	1				16	0	0	0	PMID 22383993	no	PEP-3-KLH vaccine (EGFRvIII)			1			1					no	intradermally	Basiliximab	John Sampson, Duke	Completed	2016-01-21
NCT01290692	-	GBM	newly diagnosed	86	USA	2014-02-01	II			1		0	0	86	0	n.a.	no	Autologous ex vivo stimulated PBMCs		1						1			no	i.v.	no	TVAX Biomedical	Completed	2016-10-24
NCT01081223	-	GBM	recurrence	14	USA	March 2011	I/II		1			0	14	0	0	PMID 16817692	no	Autologous ex vivo stimulated PBMCs		1						1			no	i.v.	IL-2, GM-CSF	TVAX Biomedical	Completed	2013-06-06
NCT00890032	-	GBM	recurrence	50	USA	February 2016	I	1				50	0	0	0	n.a.	no	isolated brain tumor stem cells (BTSC) mRNA-loaded DCs	1						1				no	intradermally	no	John Sampson, Duke, NCI	Completed	2016-10-17
NCT01204684	-	GBM + AA °III + AO °III	newly diagnosed	60	USA	October 2019	II			1		0	0	60	0	n.a.	no	Autologous tumor lysate pulsed on DCs	1							1			no	intradermally	Poly-IC:LC, resiquimod	Jonsson Comprehensiv Cancer Center	Active, not recruiting	2017-10-13
NCT02722512	-	GBM + Ependymoma	newly diagnosed + recurrent	20	USA	May 2019	I	1				20	0	0	0	n.a.	no	Heat Shock Protein Peptide Complex-96 (HSPCC-96) vaccine			1			1					no	intradermally	no	Ann & Robert H Lurie Children`s Hospital of Chicago	Recruiting	2017-07-21
NCT01967758	-	GBM + AA °III	newly diagnosed	11	USA	2018-08-01	I	1				11	0	0	0	n.a.	no	live-attenuated strain of Listeria monocytogenes expressing EGFRvIII and NY-ESO-1 antigens (ADU-623)			1			1					no	i.v.	antibiotics	Providence Health & Services / Aduor Biotec, Inc.	Completed	2018-10-23
NCT01280552	ICT-107	GBM	newly diagnosed	124	n.a.	December 2015	II			1		0	0	124	0	n.a.	HLA-A1 or -A2	Autologous multi-peptide-pulsed DCs	1							1			no	intradermally	no	ImmunoCellular Therapeutics, Ltd.	Completed	2017-03-20
NCT03400917	AV-GBM-1	GBM	newly diagnosed	55	USA	June 2023	II			1		0	0	55	0	n.a.	no	Autologous tumor-associated antigens (AV-GBM-1)-pulsed DCs	1					1					no	n.a.	GM-CSF	Aivita Biomedical, Inc.	Recruiting	2018-10-30
NCT02122822	-	Glioma	newly diagnosed	20	China	May 2017	I	1				20	0	0	0	PMID 29769450	no	HSPCC-96 vaccine			1			1					no	subcutaneous	no	Cure&Sure Biotech Co., LTD, Beijing Tiantan Hospital	Completed	2017-11-17
NCT02146066	DCVax-L EAP	GBM	newly diagnosed + recurrent	n.a.	USA	n.a.	n.a.									n.a.	no	Autologous tumor lysate pulsed on DCs (DCVax-L)	1							1			no	intradermally	no	Northwest Biotherapeutics	Available	2016-02-26
NCT01250470	-	All malignant Glioma	n.a.	9	USA	May 2014	I	1				9	0	0	0	n.a.	HLA-A2 or -A3	ISA-51/survivin peptide vaccine			1			1					no	subcutaneous	Montanide, Sagramostim	Roswell Park Cancer Institute, NCI	Completed	2017-02-27
NCT01171469	-	GBM + AA °III + Medulloblastoma	recurrence	8	USA	June 2012	I	1				8	0	0	0	n.a.	no	Autologous DC pulsed with allogeneic BTSC	1							1			no	intradermally	Imiquimod	Masonic Cancer Center, University of Minnesota	Completed	2017-12-02
NCT01498328	ReACT	GBM	newly diagnosed + recurrent	127	USA	May 2016	II			1		0	0	127	0	n.a.	no	EGFRvIII-peptide vaccine (CDX-110)			1			1					no	intradermally	KLH, GM-CSF	Celldex Therapeutics	Completed	2017-04-07
NCT01480479	ACT IV	GBM	newly diagnosed	745	International	2016-11-01	III				1	0	0	0	745	PMID 28844499	no	EGFRvIII-peptide vaccine (CDX-110)			1			1					no	intradermally	KLH, GM-CSF	Celldex Therapeutics	Completed	2018-01-16
NCT01522820	-	Pan Cancer (incl. Glioma)	n.a.	18	USA	July 2016	I	1				18	0	0	0	n.a.	no	DC vaccine with DEC205-NY-ESO-1 vaccine (fusion protein CDX-1401)	1					1					no	intranodally	no	Roswell Park Cancer Institute, NCI	Completed	2016-10-04
NCT00458601	ACT III	GBM	newly diagnosed	82	USA	May 2016	II			1		0	0	82	0	PMID 25586468	no	EGFRvIII-peptide vaccine (CDX-110)			1			1					no	intradermally	KLH, GM-CSF	Celldex Therapeutics	Completed	2018-01-16
NCT03650257	-	GBM	newly diagnosed	150	China	2023-08-01	II			1		0	0	150	0	n.a.	no	Heat Shock Protein Peptide Complex-96 (HSPCC-96) vaccine			1			1					no	n.a.	no	Cure&Sure Biotech Co., LTD, Beijing Tiantan Hospital	Not yet recruiting	2018-08-28
NCT03149003	WIZARD 201G	GBM	recurrence	200	International	June 2020	II			1		0	0	200	0	n.a.	HLA-A02:01, -A02:06, -A24:02	Synthetic cancer peptide vaccine against WT-1 expressing cells (DSP-7888)		1				1					no	intradermally or s.c.	no	Boston Biomedical, Inc	Recruiting	2018-09-11
NCT03657576	C134-HSV-1	GBM + AA °III	recurrence	24	USA	2023-09-01	I	1				24	0	0	0	n.a.	no	Cancer killing IRS HSV-1 (C134)				1					1		no	intratumorally	no	University of Alabama at Birmingham	Not yet recruiting	2018-09-05
NCT00293423	-	HGG	recurrence	41	USA	2013-08-01	I/II		1			0	41	0	0	n.a.	no	Heat Shock Protein Peptide Complex-96 (HSPCC-96) vaccine			1			1					no	intradermally	no	University of California, SF; Agenus Inc., NCI	Completed	2017-08-21
NCT00589875	BrTK02	GBM + AA °III	newly diagnosed	52	USA	2016-08-01	II			1		0	0	52	0	PMID 26843484	no	Genetically modified Herpes thymidine kinase gene adenoviral vector				1					1		no	intratumorally	no	Advantagene, Inc.	Completed	2017-04-11
NCT02800486	-	GBM + AA °III + AO °III	recurrence	37	USA	May 2021	II			1		0	0	37	0	n.a.	no	Super selective intra-arterial injection of anti-EGFR-antibody (Cetuximab)					1					1	no	intraarterially	no	Northwell Health	Recruiting	2018-03-01
NCT00003185	-	GBM + AA °III	newly diagnosed	40	USA	July 1998	II			1		0	0	40	0	PMID 9647171	no	Autologous tumor cell vaccine, consecutive LN removal and T cell expansion (+SEA + IL-2) and re-infusion		1						1			no	intradermally / i.v.	GM-CSF, SEA, IL-2	The Cleveland Clinic, NCI	Completed	2013-12-04
NCT00751270	BrTK01	GBM + AA °III	newly diagnosed	15	USA	2011-01-01	I	1				15	0	0	0	PMID 21844505	no	Genetically modified Herpes thymidine kinase gene adenoviral vector				1					1		no	intratumorally	no	Advantagene, Inc.	Completed	2016-03-04
NCT00612001	-	HGG	newly diagnosed + recurrent	8	USA	October 2012	I	1				8	0	0	0	PMID 23377664	HLA-A02+	Glioma-associated antigen peptide-pulsed autologous DCs	1					1					no	intradermally	GM-CSF	Jonsson Comprehensiv Cancer Center, NCI	Completed	2015-10-05
NCT00069940	-	Brain tumor + GI-Tumor + Sarcoma	newly diagnosed + recurrent	n.a.	USA	2008-08-01	I	1								n.a.	HLA-A02+	Telomerase 540-548 peptide vaccine			1			1					no	n.a.	GM-CSF	Dana Farber Cancer Institute, NCI	Completed	2010-12-28
NCT02208362	-	HGG	recurrence	92	USA	May 2020	I	1				92	0	0	0	n.a.	no	IL13Rα2-specific, 41BB-costimulatory CAR/truncated CD19-expressing Autologous T lymphocytes		1			1					1	no	intratumorally / -cavitary / -ventricular	no	Citiy of Hope Medical Center, NCI, Gateway for Cancer Research, Mustang Bio, Inc.	Recruiting	2018-10-30
NCT02498665	-	Multiple Cancers (incl. GBM)	n.a.	24	USA	October 2018	I	1				24	0	0	0	n.a.	HLA-A02:01, -A02:06, -A24:02	Synthetic cancer peptide vaccine against WT-1 expressing cells (DSP-7888)		1				1					no	intradermally	no	Boston Biomedical, Inc	Active, not recruiting	2018-09-19
NCT00068510	-	HGG	newly diagnosed	28	USA	2012-09-01	I	1				28	0	0	0	PMID 16061868	no	Autologous tumor lysate pulsed on DCs	1							1			no	intradermally	GM-CSF	Jonsson Comprehensiv Cancer Center, NCI	Completed	2015-10-02
NCT03043391	PVSRIPO	Malignant Glioma	recurrence	12	USA	July 2021	I	1				12	0	0	0	n.a.	no	recombinant Polio-Virus (PVSRIPO)				1					1		no	intratumorally	Polio-Boost	Istari Oncology, Solving Kids Cancer, Musella Foundation Inc., The Andrew McDonough B+ Foundation, Duke University	Recruiting	2018-10-30
NCT00014573	-	Malignant Brain Tumors	newly diagnosed	n.a.	USA	October 2004	II			1						n.a.	no	Autologous tumor cell vaccine, consecutive apheresis, CT, and re-infusion		1						1			no	subcutaneous, i.v.	G-CSF, GM-CSF, IL-2	Barbara Ann Karmanos Cancer Institute, NCI	Completed	2013-04-08
NCT02457845	-	Malignant Brain Tumors	newly diagnosed + recurrent	18	USA	May 2019	I	1				18	0	0	0	n.a.	no	Oncolytic Herpes simplex virus-1 (HSV-1)(G207)				1					1		no	intratumorally	no	University of Alabama at Birmingham	Recruiting	2018-07-06
NCT00004024	-	Astrocytoma/Oligodendroglioma °II-IV	newly diagnosed + recurrent	60	USA	2004-01-01	II			1		0	0	60	0	PMID 16817692	no	Autologous irradiated tumor cell vaccine, consecutive cell collection and activation (OKT3), re-infusion		1						1			no	intradermally + i.v.	GM-CSF, IL-2	Barbara Ann Karmanos Cancer Institute, NCI	Completed	2013-04-05
NCT01621542	-	Pan Cancer (incl. Glioma)	n.a.	64	USA	May 2017	I	1				64	0	0	0	n.a.	HLA-A02:01, -A02:06	WT1-specific vaccine (WT2725)			1			1					no	n.a.	no	Sunovion Dainippon Pharma Co., Ltd.	Completed	2017-06-05
																			33	10	26	7	4	33	11	23	7	4
								36	11	27	3	904	296	2065	865
																		DC	31				peptide/protein	33
																		DC + Cell Transfer	2				mRNA	11
												4130						Cell Transfer	8				Tumor lysate	23
																		Peptide vaccine	26				Virus	7
																		Viral immunotherapy	7				others	4
																		others	4					78
																			78

## Sheet: Figure
trials	78
patients	4130
USA	58		number of pats in
China	5		I	904
International	3		I/II	296
Germany	2		II	2065
Norway	2		III	865
Switzerland	2
UK	1
Russia	1
Spain	1
Austria	1
Belgium	1
n.a.	1
I	36
I/II	11
II	27
III	3
n.a.	1
HLA stratified
yes	16
no	62
w/ Checkpoint
yes	6
no	72
primary route
intradermal	41
subcutaneous	10
intraarterial	1
intratumoral	8
n.a.	11
intranodal	2
per os	1
intrathecal	1
i.v.	3
Adjuvant
yes	37
no	41
GM-CSF	21
Poly-ICLC	9
others	7
completed	37
recruiting	16
others	25
Type of therapy
DC	31
DC + Cell Transfer	2
Cell Transfer	8
Peptide vaccine	26
Viral immunotherapy	7
others	4
Type of antigen
peptide/protein	33
mRNA	11
Tumor lysate	23
Virus	7
others	4
Tumor type
newly diagnosed	42
recurrence	21
newly + recurrence	10
n.a.	5
